# Supplementary material
Source: Springer Nature journal article supplement (https://repositorio.tec.mx/bitstream/handle/11285/613679/12864_2006_958_MOESM10_ESM.pdf)

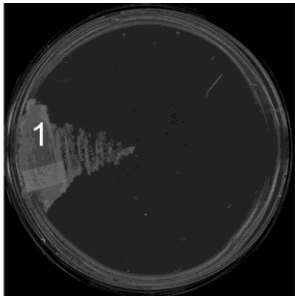

**+ Gly/Met, IPTG/Cm**

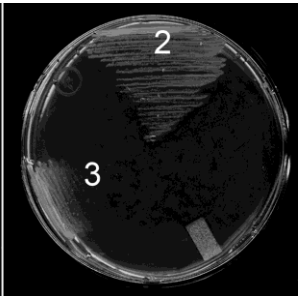

**+ Gly/Met, Ara/Amp**

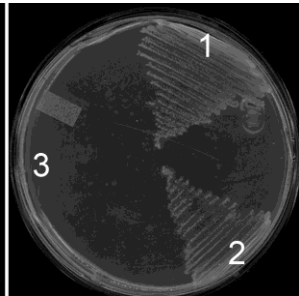

**- Gly/Met, Ara/IPTG**

Supplement: MOESM10 [file 12864_2006_958_MOESM10_ESM.pdf]
